# Supplementary material for: Genetic Variation of the Endangered Neotropical Catfish Steindachneridion scriptum (Siluriformes: Pimelodidae)
Source: PubMed Central journal article supplement (PMC5827538; doi:10.3389/fgene.2018.00048), 2018-02-19

## *Supplementary Material*

### **Genetic variation of the endangered Neotropical catfish *Steindachneridion scriptum* (Siluriformes: Pimelodidae)**

**Rômulo Veiga Paixão\*, Josiane Ribolli, Evoy Zaniboni Filho**

\* **Correspondence:** Corresponding Author: romulo.veiga.paixao@gmail.com

#### **1 Supplementary Information - SI**

**SI 1.** Neighbor-joining phylogenetic tree based on COI sequences of *Steindachneridion scriptum* from Upper Uruguay and Upper Paraná Basins, *S. parahybae* from Paraíba do Sul Basin and *P. corruscans* and *Z. jahu* as outgroup.

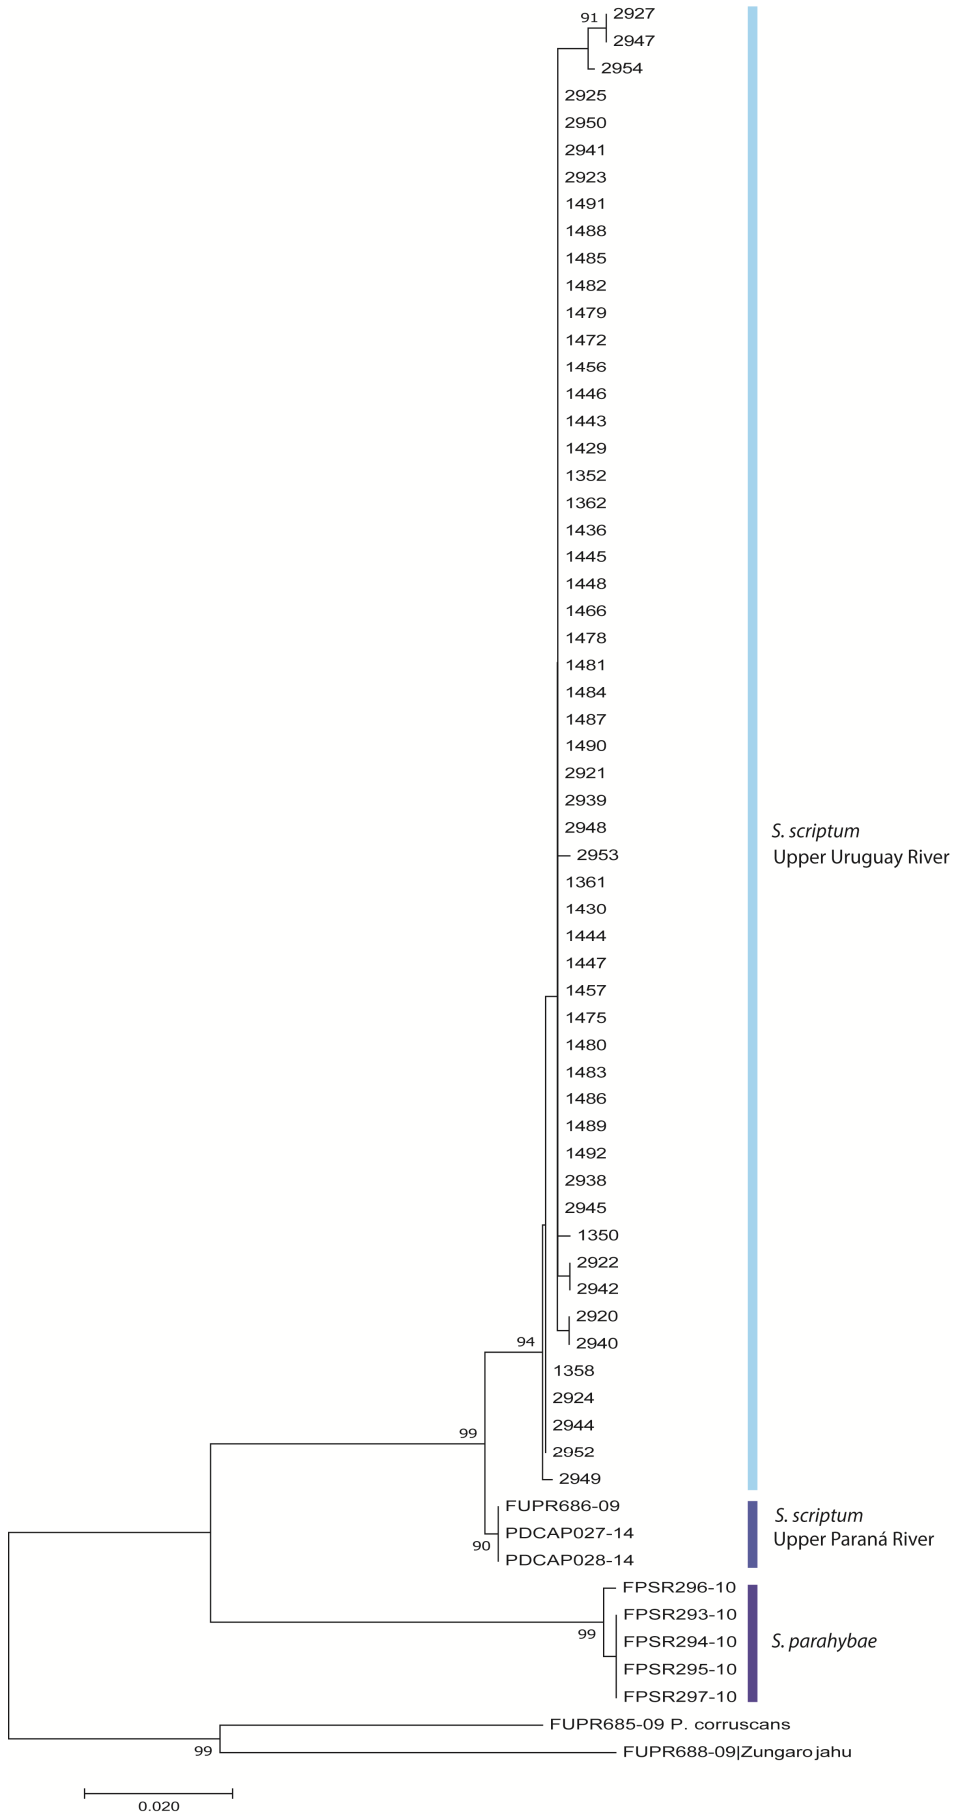

Supplement: Image_1.pdf [file Image_1.pdf]
