# Supplementary material for: Genetic Variation of the Endangered Neotropical Catfish Steindachneridion scriptum (Siluriformes: Pimelodidae)
Source: PubMed Central journal article supplement (PMC5827538; doi:10.3389/fgene.2018.00048), 2018-02-19

*Supplementary Material*

**Genetic variation of the endangered Neotropical catfish *Steindachneridion scriptum* (Siluriformes: Pimelodidae)**

**Rômulo Veiga Paixão\*, Josiane Ribolli, Evoy Zaniboni Filho**

\* **Correspondence:** Corresponding Author: romulo.veiga.paixao@gmail.com

**Supplementary Information - SI**

**SI 3.** Pairwise  $F_{st}$  values plotted over distance reveal evident pattern of isolation by distance ( $r= 0.82$ ,  $p= 0.0000$ ) for *Steindachneridion scriptum* from Upper Uruguay and Upper Paraná basins, based on mtDNA control region haplotypes.

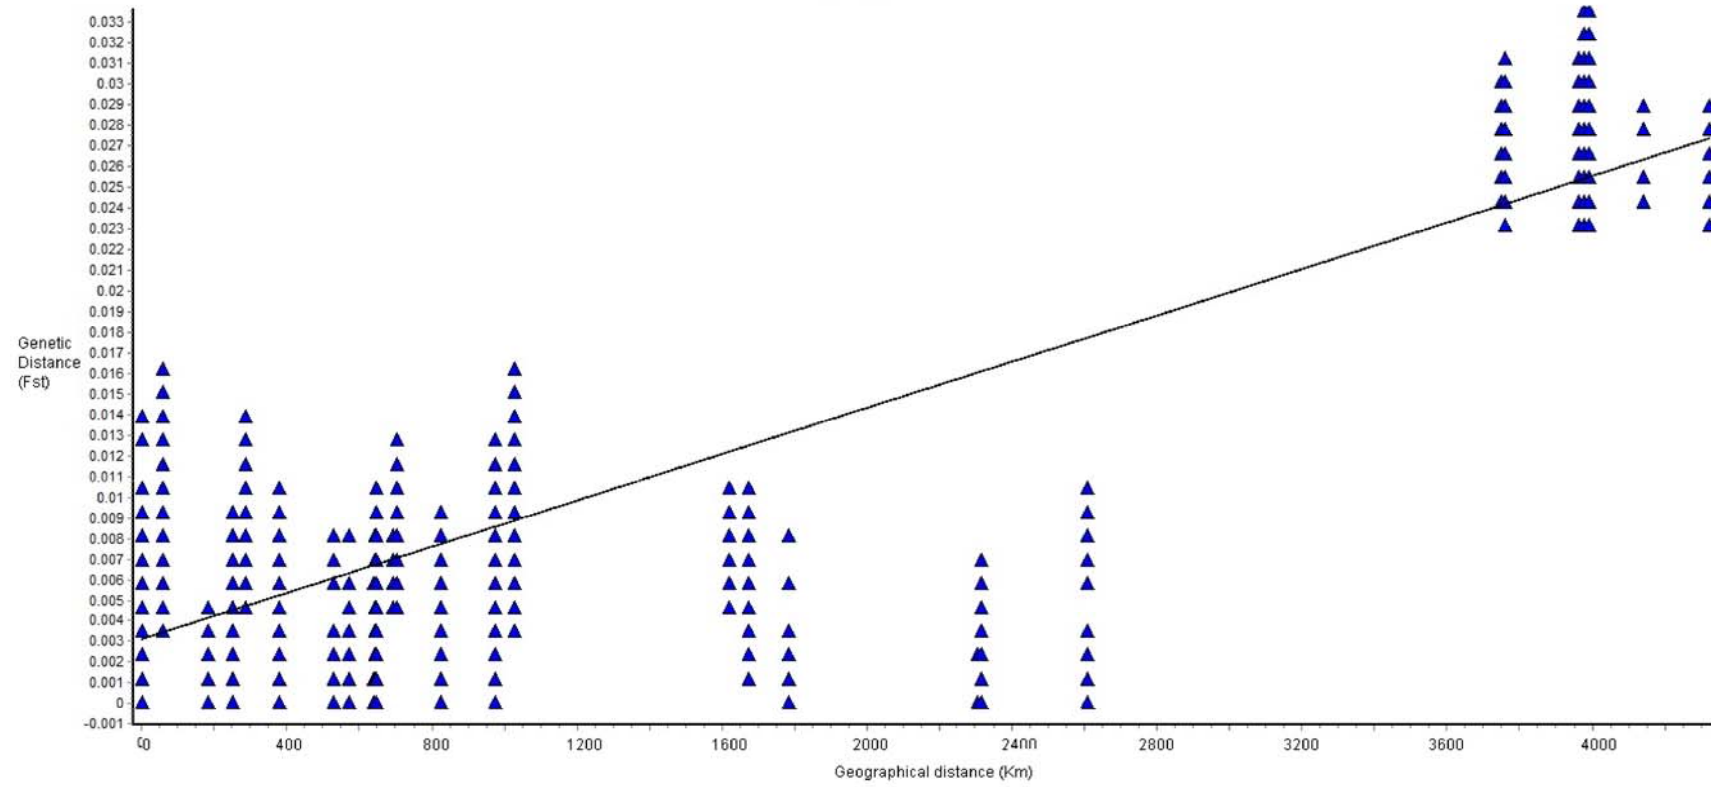

Supplement: Image_3.pdf [file Image_3.pdf]
